# Supplementary material for: Wintertime photochemistry in Beijing: Observations of RO x radical concentrations in the North China Plain during the BEST-ONE campaign
Source: Copernicus journal article supplement (doi:10.5194/acp-2018-359), 2018-04-09
Supplement: Supplementary file [file acp-2018-359-AC1-supplement.zip]

*Supplement of*

**Wintertime photochemistry in Beijing: Observations of RO<sub>x</sub> radical concentrations in the North China Plain during the BEST-ONE campaign**

Zhaofeng Tan et al.

Correspondence to: Keding Lu (k.lu@pku.edu.cn) and Yuanhang Zhang (yhzhang@pku.edu.cn)

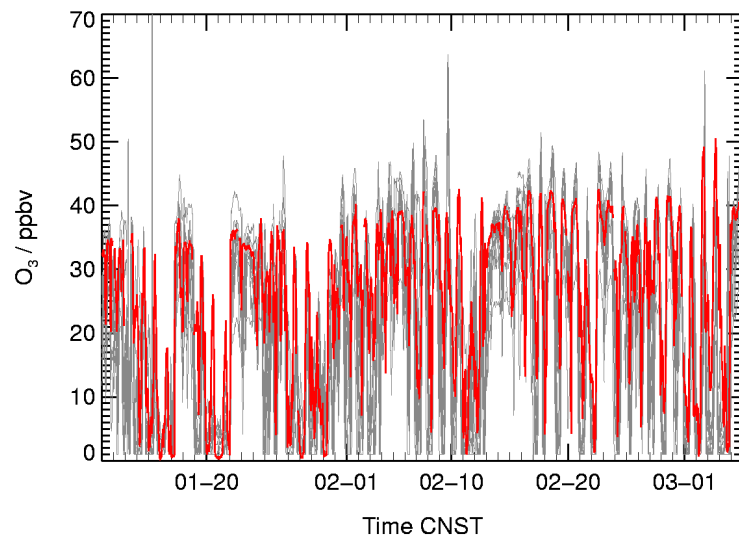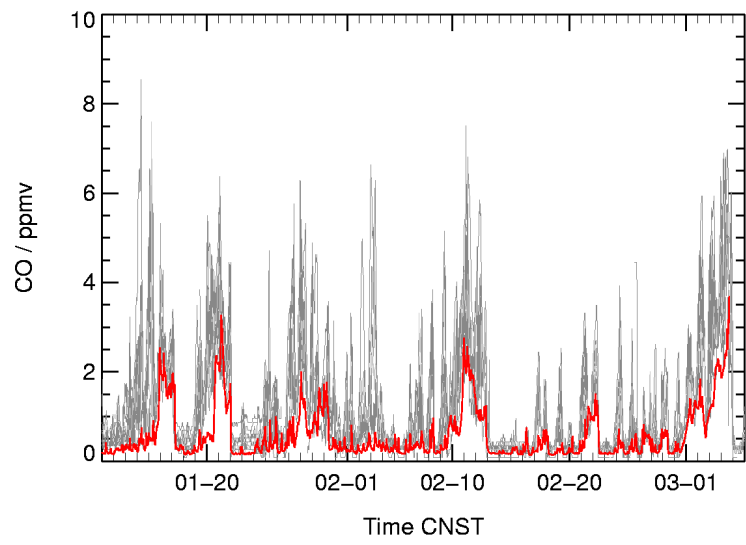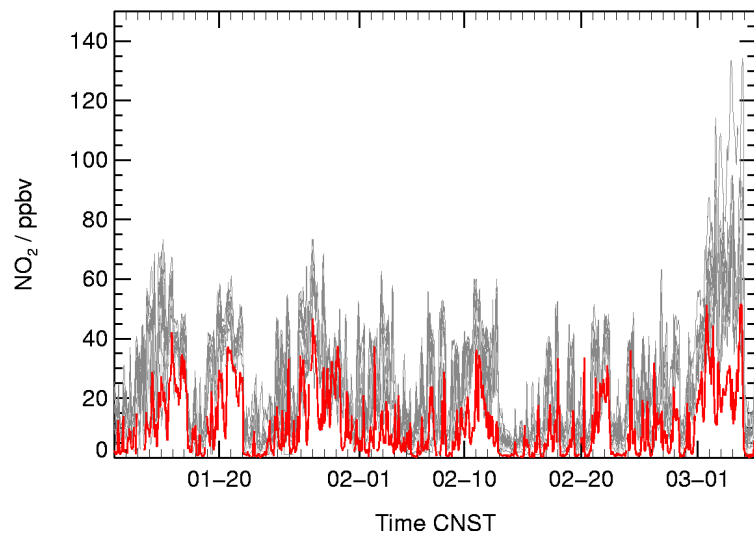

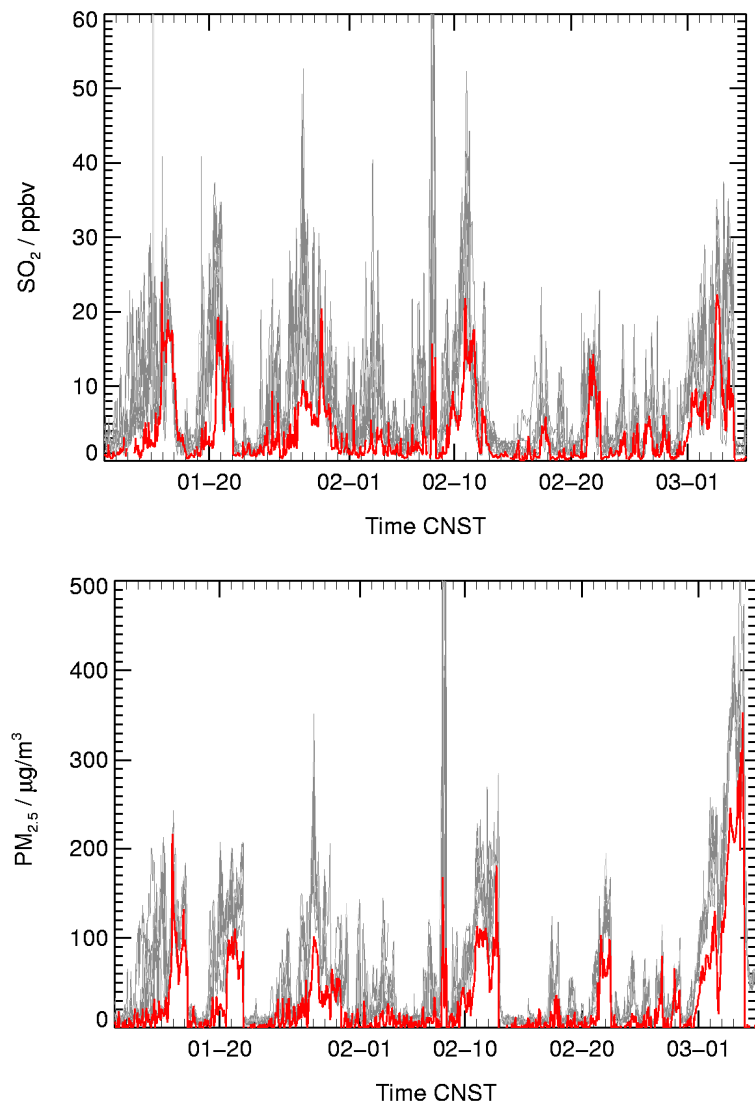

**Figure S1.** Time series of measured  $\text{CO}$ ,  $\text{O}_3$ ,  $\text{NO}_2$ ,  $\text{SO}_2$ , and  $\text{PM}_{2.5}$  (Red: measurement at BEST-ONE site; Grey: measurements at 12 Environmental Protection Agency stations in Beijing urban areas)

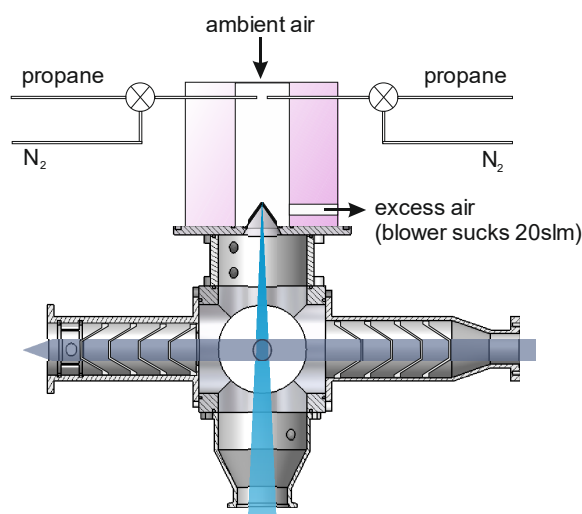

Figure S2. Schematic plot of the chemical modulation setup.

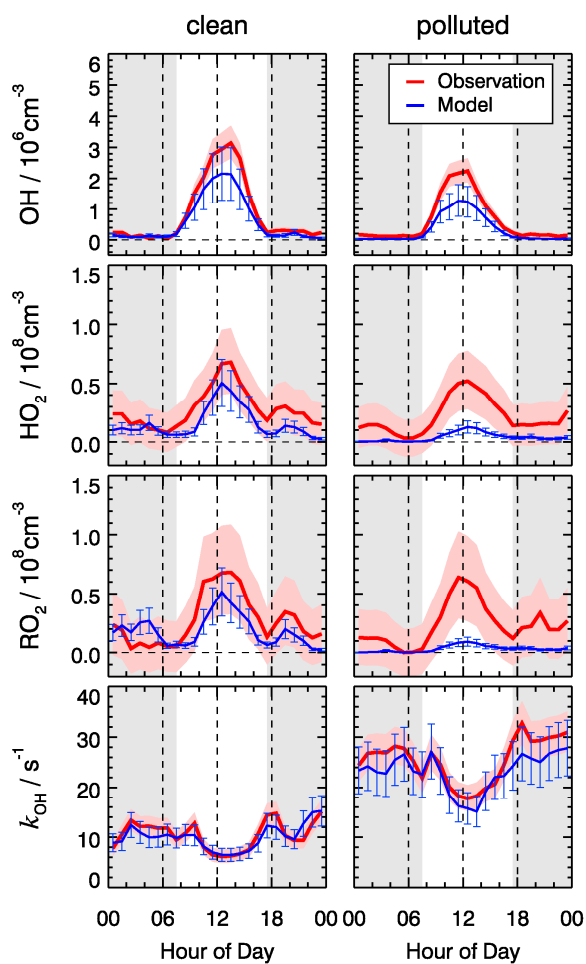

Figure S3. Measurement and model calculation comparison for clean (left) and polluted episodes (right). Thick lines give median values, colored areas give the 25 and 75% percentiles. The vertical bars denote the modelled uncertainty (40%).
